# Supplementary material for: Mesenchymal stromal cell delivery via an ex vivo bioreactor preclinical test system attenuates clot formation for intravascular application
Source: PubMed Central journal article supplement — Stem Cells Transl Med. 2021 Feb 1;10(6):883–94. doi: 10.1002/sctm.20-0454 (PMC8133341; doi:10.1002/sctm.20-0454), 2021-02-01
Supplement: SCT3-10-883-s001.pdf [file SCT3-10-883-s001.pdf]

|                                | Donor #1<br>MSCs | Donor #2<br>MSCs | Donor #3<br>MSCs |
|--------------------------------|------------------|------------------|------------------|
|                                | Positive (%)     |                  |                  |
| <b><u>MSC markers</u></b>      |                  |                  |                  |
| CD73                           | 100              | 99.6             | 100              |
| CD90                           | 100              | 99.9             | 100              |
| CD105                          | 100              | 99.8             | 100              |
| CD166                          | 100              | 99.2             | 99.9             |
| <b><u>Negative markers</u></b> |                  |                  |                  |
| CD14                           | 2.6              | 2.3              | 1.6              |
| CD34                           | 0.4              | 0.8              | 1.03             |
| CD45                           | 0.5              | 1.1              | 0.2              |

**Table S1. Flow Cytometric Characterization of Donor Cells.** Cells were thawed and subjected to staining from standard MSC markers to characterize cell populations. All donors showed strong positive markers of MSCs and lacked the corresponding negative markers.

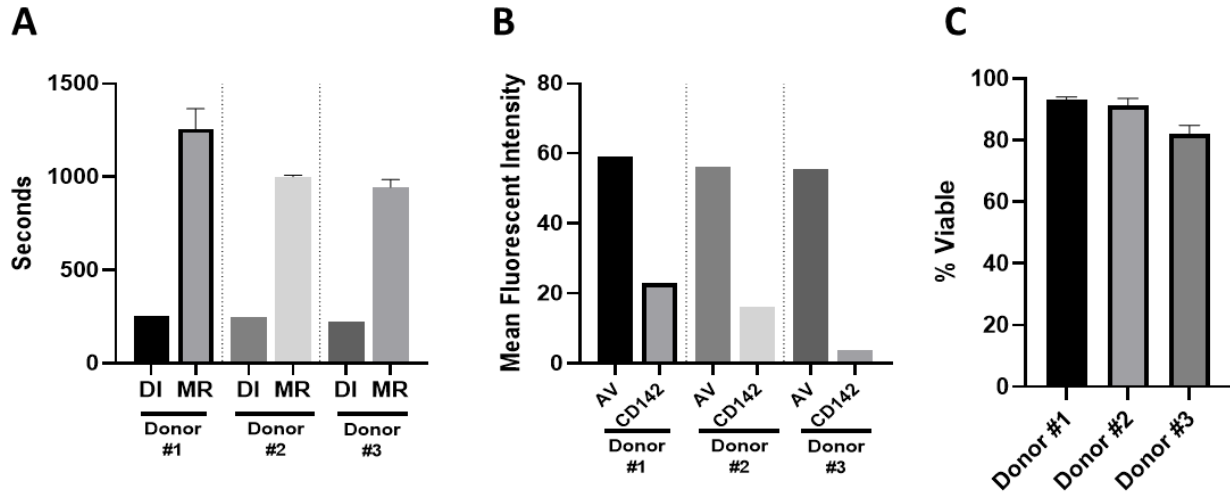

**Figure S1. MSC donor testing.** Microreactors were seeded with  $1 \times 10^6$  viable MSCs each from distinct donors and allowed to attach for 2 hours at 37 °C, followed by a 24 hour hold at room temperature prior to perfusion. After each groups' cells were prepared warmed FFPP was perfused through circuit for 5 minutes then subjected to spectrophotometric measurements, if not already clotted. **(A)** Measurements of fibrin clot formation in plasma were then made every 10 seconds over a 45-minute period. Direct injection (DI), microreactor (MR) **(B)** Prior to microreactor seed, cells were subjected to staining and flow cytometry for known pro-coagulation markers phosphatidylserine (Annexin V; AV) and tissue factor (CD142). **(C)** Cell viability post-thaw. Error bars represent  $\pm$  standard deviation.
